# Supplementary material for: 4D reconstruction of murine developmental trajectories using spherical harmonics
Source: PubMed Central journal article supplement (PMC9481268; doi:10.1016/j.devcel.2022.08.005), 2022-09-12
Supplement: mmc1.pdf [file mmc1.pdf]

**Developmental Cell, Volume 57**

**Supplemental information**

**4D reconstruction of murine developmental  
trajectories using spherical harmonics**

**Giovanni Dalmasso, Marco Musy, Martina Niksic, Alexandre Robert-Moreno, Claudio  
Badía-Careaga, Juan Jose Sanz-Ezquerro, and James Sharpe**

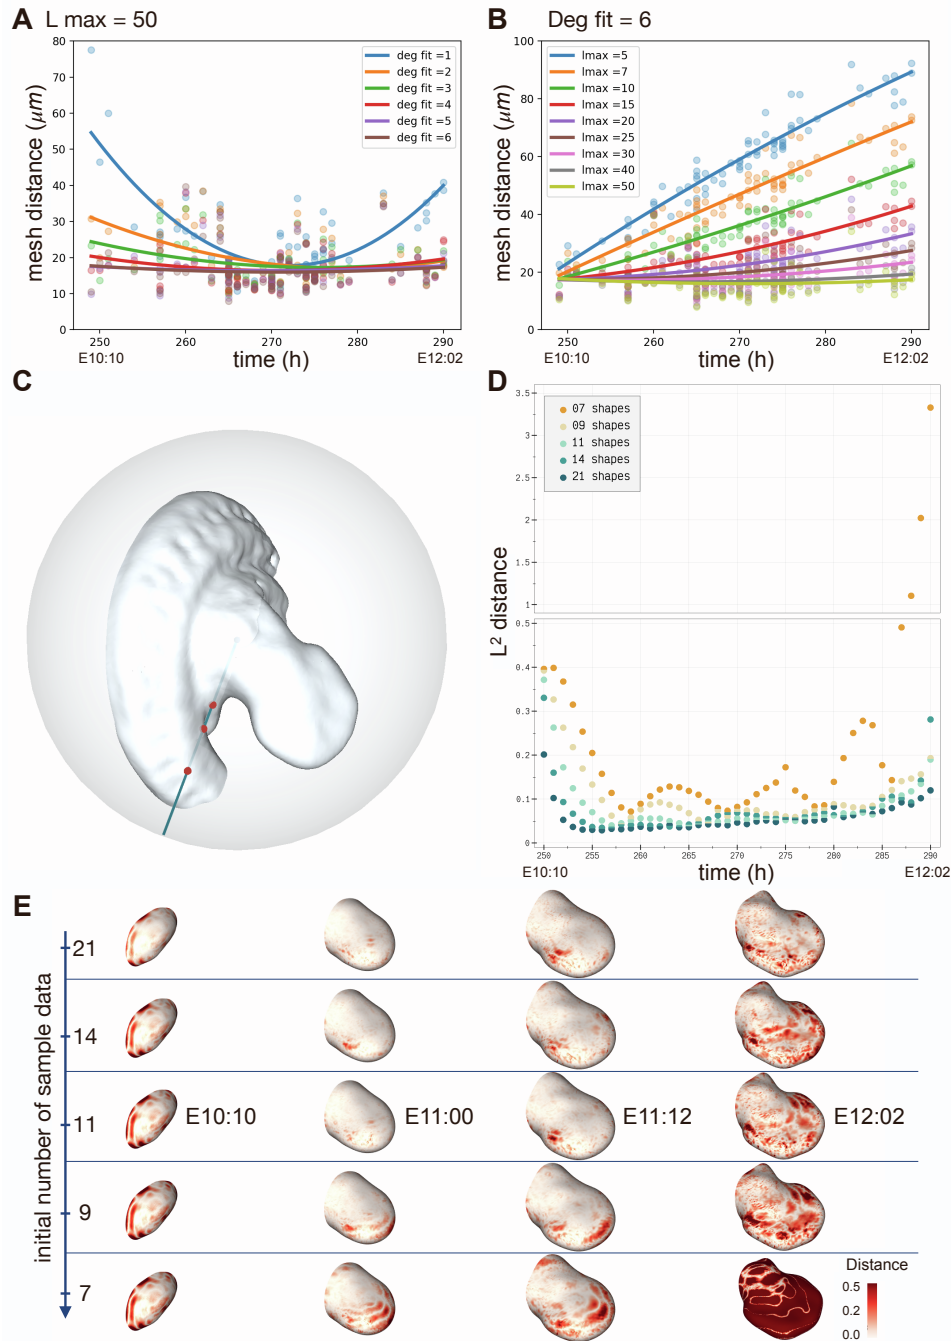

**Figure S1: Assessing the degree of spherical harmonics expansion**, related to [Figure 1](#).

**A** - Comparison of different reconstructions according to mesh distances fixing the value of  $l_{\max} = 50$  and varying the degree of the spline (from 1 to 6) interpolating the spherical harmonics coefficients.

**B** - Comparison of different reconstructions according to mesh distances fixing the degree's value of the spline interpolating the spherical harmonics coefficients and the value of  $l_{\max}$  (5, 7, 10, 15, 20, 25, 30, 35, 40, 45, 50).

**C** - Representative example of a surface intersected three times (red dots) by a radius of a sphere which circumscribes it.

**D** -  $L^2$  distance between sets of reconstructed and original surfaces reducing the total number of the initial set of data (i.e: 21, 14, 11, 9, 7).

**E** - Sets of reconstructed surfaces reducing the total number of the initial set of data (i.e: 21, 14, 11, 9, 7) at four different developmental stages (i.e: E10:10, E11:01, E11:12, E12:10). The color map shows the distance between the reconstructed meshes and the original data.

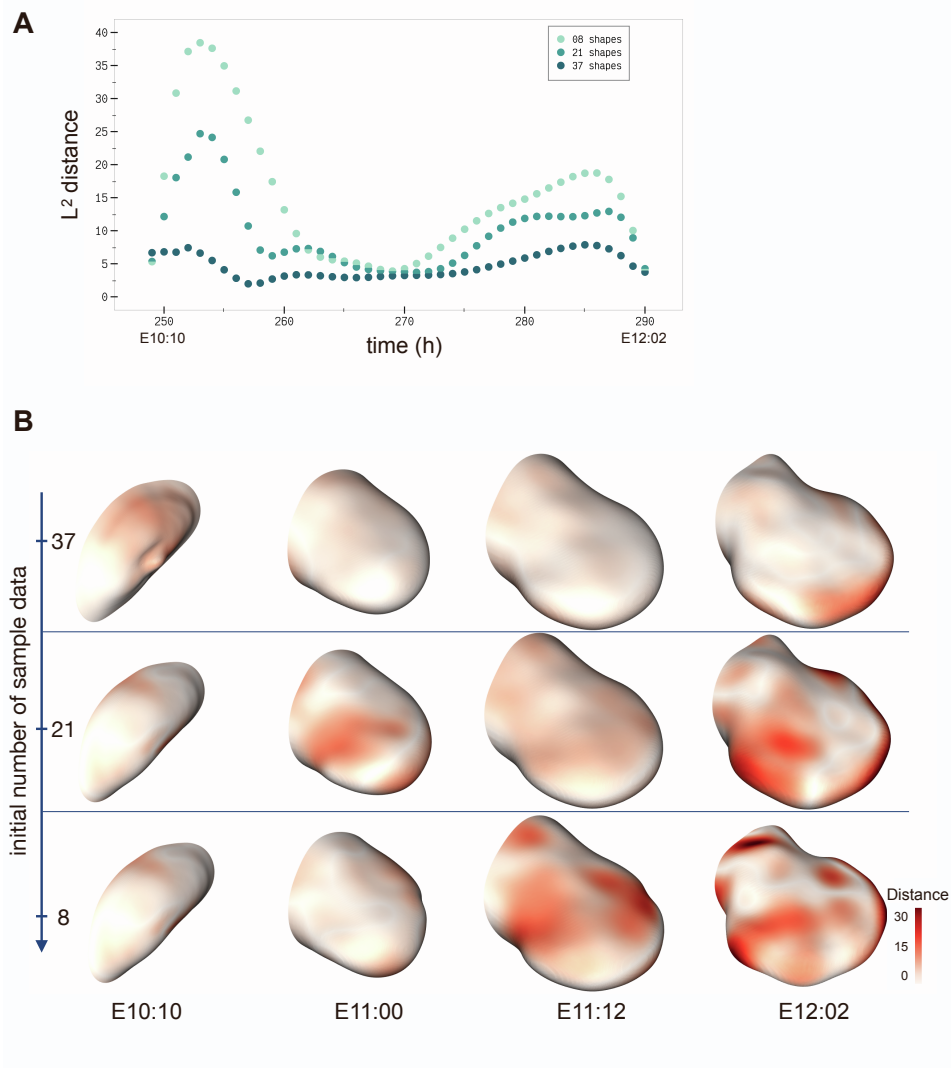

**Figure S2: Assessing the degree of spherical harmonics expansion, related to Figure 1.**

**A** -  $L^2$  distance between sets of reconstructed and original surfaces reducing the total number of the initial set of data (i.e: 37, 21, 8).

**B** - Sets of reconstructed surfaces reducing the total number of the initial set of data (i.e: 37, 21, 8) at four different developmental stages (i.e: E10:10, E11:01, E11:12, E12:10). The color map shows the distance between the reconstructed meshes and the original data.

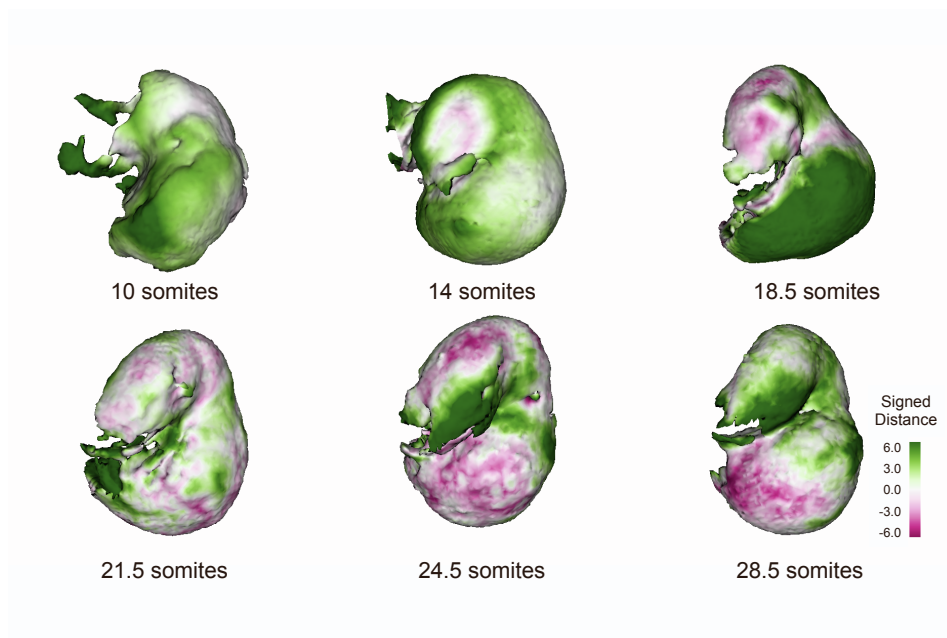

**Figure S3: Precision of the reconstruction**, related to [Figure 5](#).

The heart reconstruction at representative developmental time points color map representing the signed distance between the reconstruction and the original surface.

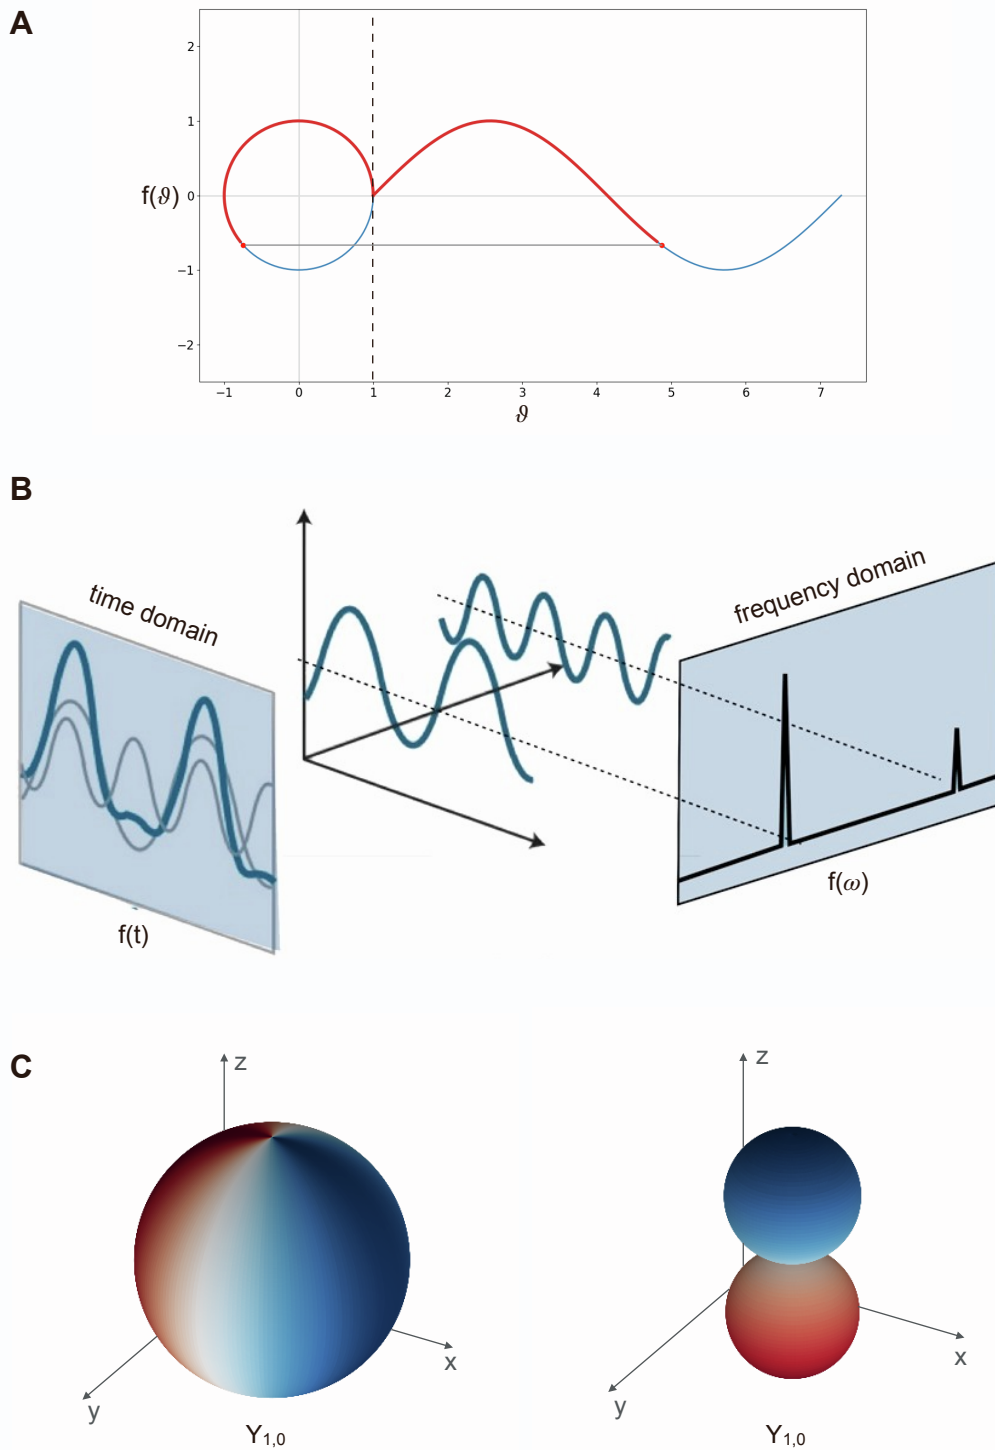

**Figure S4: Spherical harmonics and Fourier expansion**, related to STAR Methods.

**A** Representation of the function  $\sin \vartheta$  and its projection onto the unit circle.

**B** Schematic representation of a function  $f(t)$  in the time domain, its expression given by the sum of basis functions and its Fourier transform  $f(\omega)$  in the frequency domain (*modified from Gendler (2017)*).

**C** Two equivalent representations of the spherical harmonic  $Y_1^0$  of degree  $l = 1$  and order  $m = 0$ .

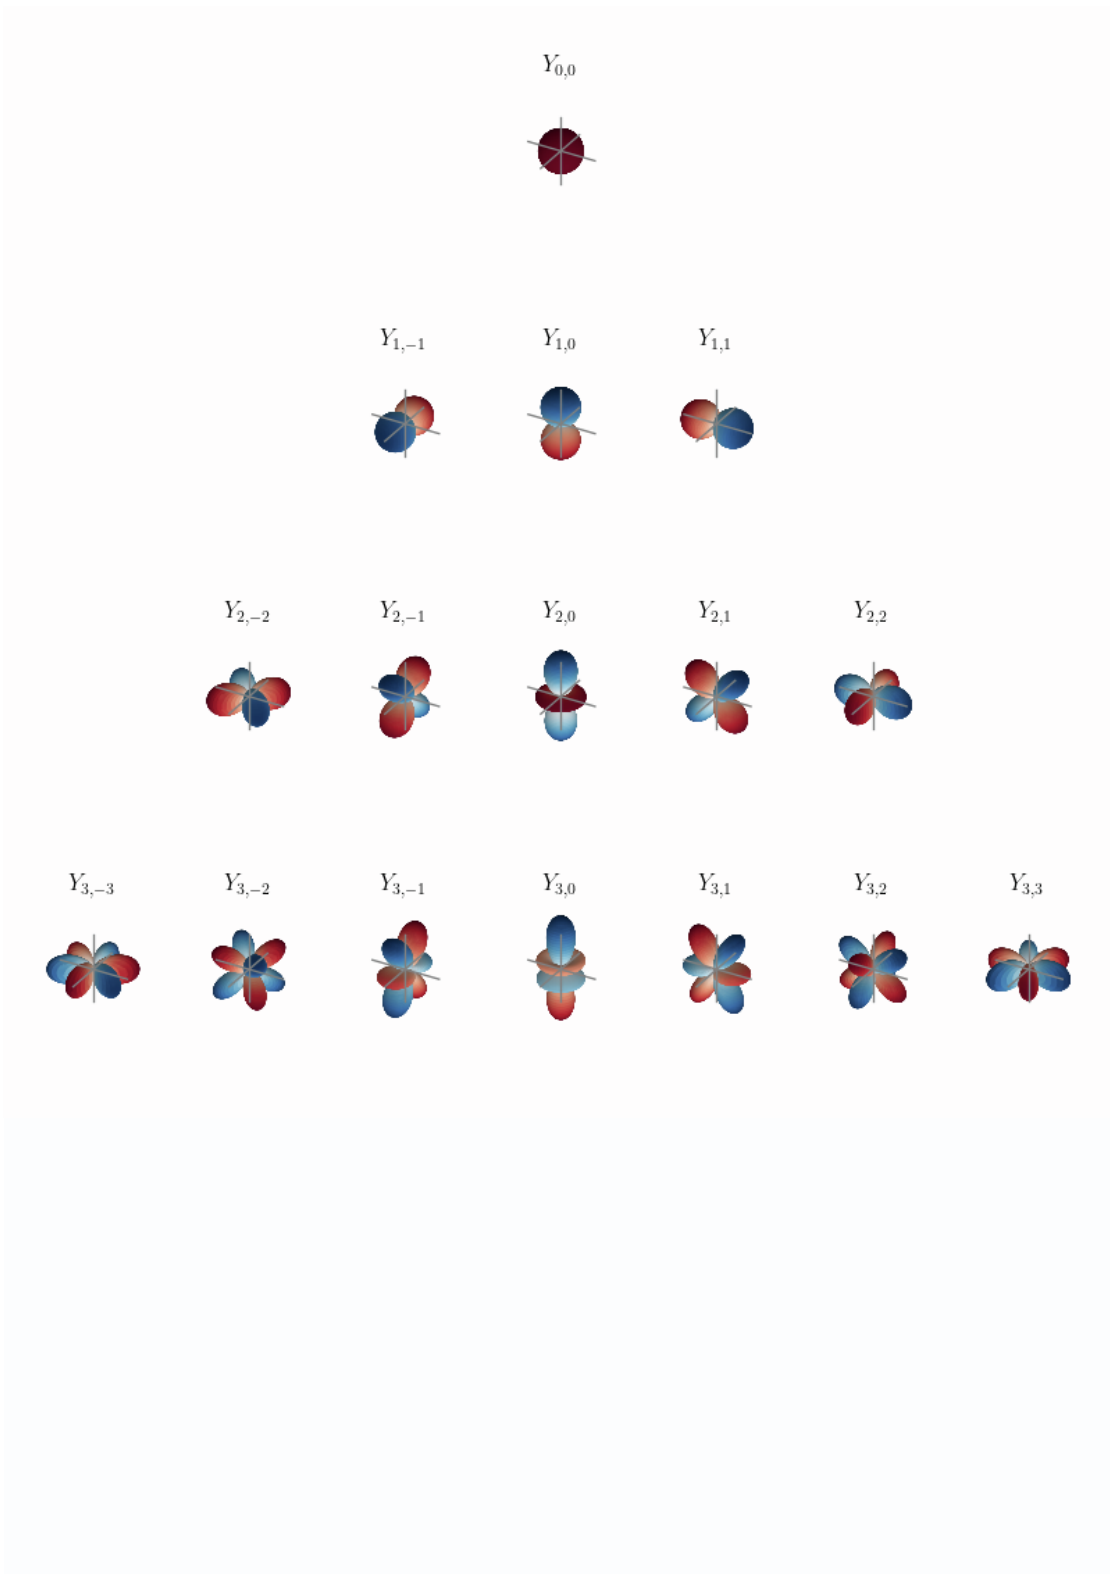

**Figure S5: Hierarchical tree of spherical harmonics expansion**, related to STAR Methods. Representations of spherical harmonic functions for  $l = 0, 1, 2, 3$ .
